# Supplementary material for: Detection and Analysis of Antidiarrheal Genes and Immune Factors in Various Shanghai Pig Breeds
Source: MDPI journal article supplement (doi:10.3390/biom14050595), 2024-05-17
Supplement: s1 [file s1]

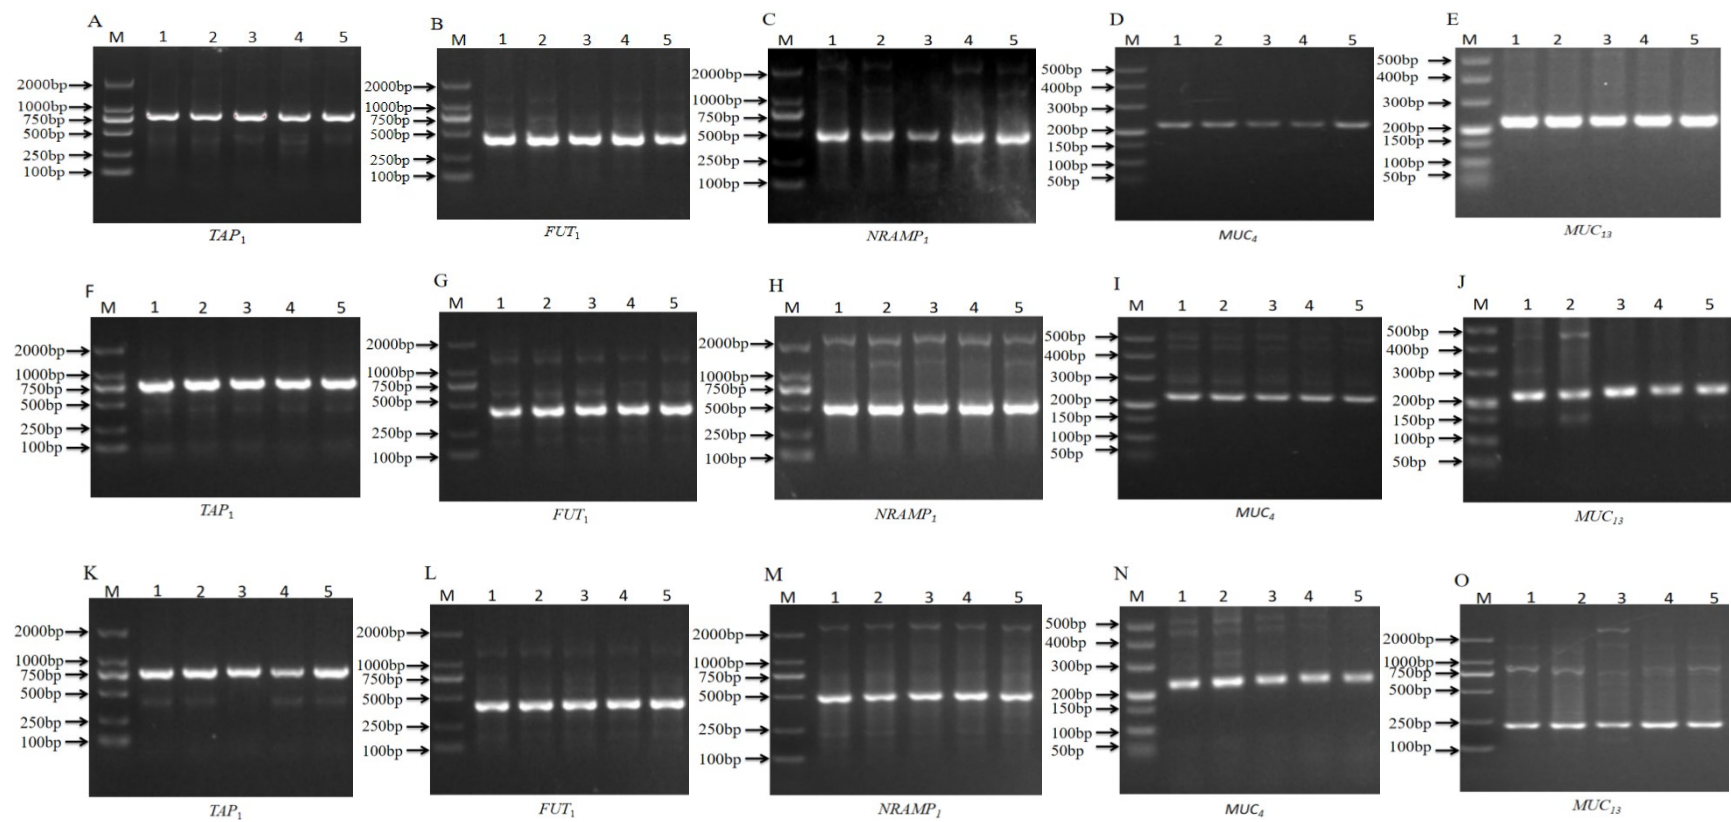

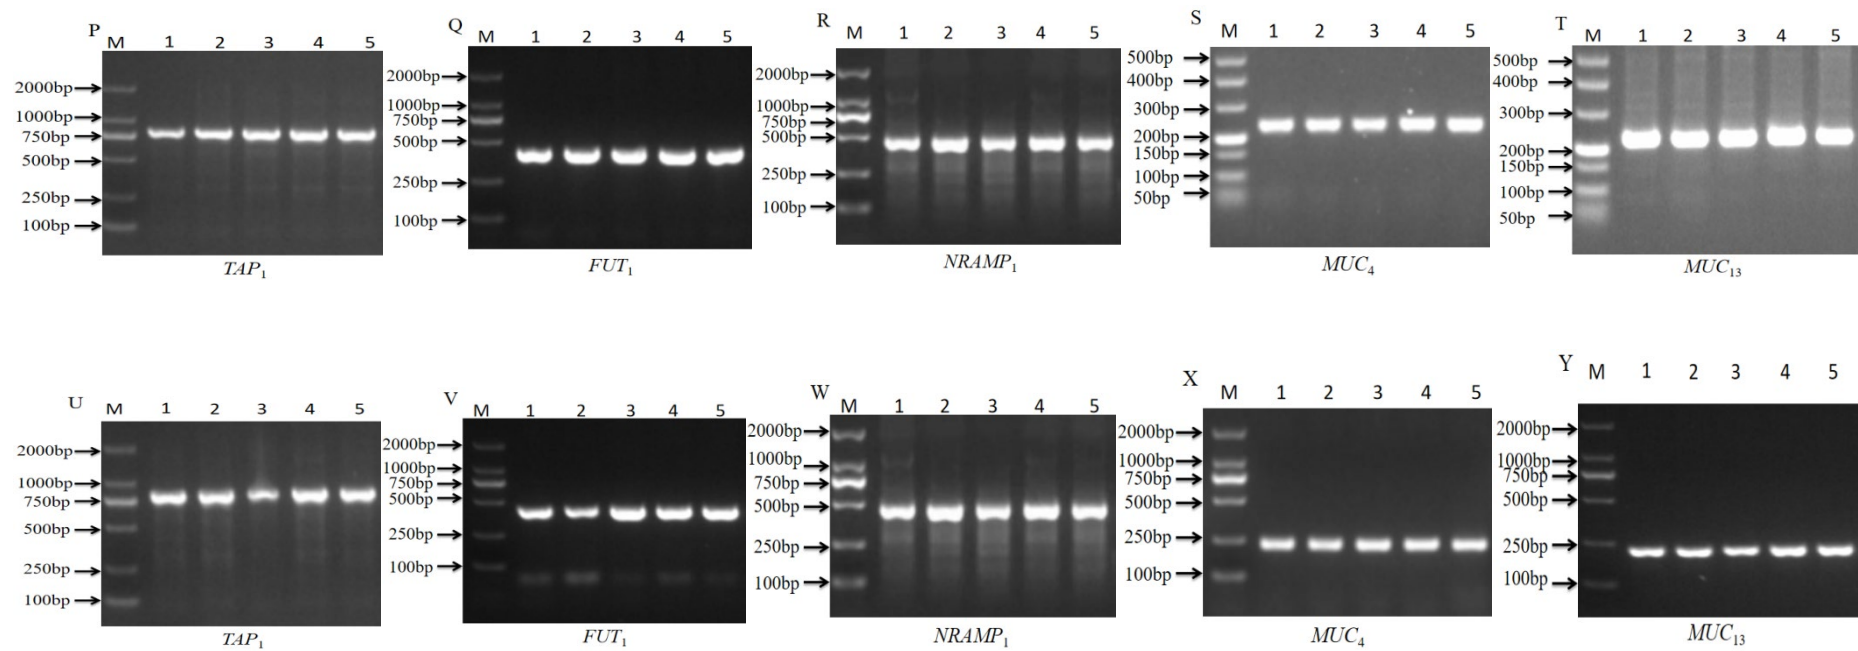

**Figure S1. Electrophoresis of PCR products of *TAP1*, *FUT1*, *NRAMP1*, *MUC4*, and *MUC13* in Shanghai White Pig, Fengjing Pig, Sha Wutou Pig, Meishan pig and Pudong white pig**

A-E is the electrophoretic map of 5 genes in Shanghai White Pig, F-J is the electrophoretic map of 5 genes in Fengjing Pig, K-O is the electrophoretic map of 5 genes in Sha Wutou Pig, P-T is the electrophoretic map of 5 genes in Meishan pig, U-Y is the electrophoretic map of 5 genes in pudong white pig. M is DNAMarker, and 1-5 digits are PCR amplification results.
