# Supplementary material for: Detection and Analysis of Antidiarrheal Genes and Immune Factors in Various Shanghai Pig Breeds
Source: MDPI journal article supplement (doi:10.3390/biom14050595), 2024-05-17
Supplement: s1 [file s1]

**Table S2.** Primer sequences used for PCR in this study.

| Gene name                | Primer sequences (5-3)                                  | Tm (°C) | Length (bp) |
|--------------------------|---------------------------------------------------------|---------|-------------|
| <i>TAP<sub>1</sub></i>   | F: GAAATGTGGATAAGAGCA<br>R: AAACAGACGGATAATGAAAGAGG     | 767     | 46          |
| <i>FUT<sub>1</sub></i>   | F: CTTBBTGAACGTCATCAAGABB<br>R: C TTCAGBBAGGGCTBBTTTAAG | 421     | 55          |
| <i>NRAMP<sub>1</sub></i> | F: GGBBAGCTTBBACAGTCTBBAG<br>R: CGGGGGTACAAAGGGGAAGAAG  | 483     | 64          |
| <i>MUC<sub>4</sub></i>   | F: TCTAAAGATGCTGGTGCTAC<br>R: CTGGCTGTATTTCTGTTGTG      | 220     | 50          |
| <i>MUC<sub>13</sub></i>  | F: GGAGAGABBAAABBCACAGA<br>R: CTBBTCABBAGCTBBTTAGC      | 230     | 60          |
