# Supplementary material for: Detection and Analysis of Antidiarrheal Genes and Immune Factors in Various Shanghai Pig Breeds
Source: MDPI journal article supplement (doi:10.3390/biom14050595), 2024-05-17
Supplement: s1 [file s1]

**Table S1.** The body weights and ages of pigs.

| <b>Pig breeds</b>   | <b>Ages (Days)</b> | <b>Weights (Kg)</b> |
|---------------------|--------------------|---------------------|
| Shanghai white pigs | 238.17 ± 16.31     | 74.93 ± 5.58        |
| Fengjing pigs       | 240.23 ± 16.80     | 77.43 ± 4.19        |
| Shawutou pigs       | 244.70 ± 16.78     | 78.57 ± 5.38        |
| Meisha pigs         | 240.47 ± 18.39     | 77.50 ± 6.10        |
| Pudong white pigs   | 237.03 ± 18.06     | 77.77 ± 4.07        |
